# Supplementary material for: A Microsatellite Genotyping-Based Genetic Study of Interspecific Hybridization between the Red and Sika Deer in the Western Czech Republic
Source: MDPI journal article supplement (doi:10.3390/ani11061701), 2021-06-07
Supplement: s1 [file s1]

**Table S2.** The  $p$ -values for the genotypic disequilibrium between the pairwise loci within each species (obtained with FSTAT 2.9.4). The adjusted  $p$ -value for the 5% nominal level of the Bonferroni correction is 0.000909.

| <b>Pairwise loci</b>    | <b>Red Deer</b> | <b>Sika Deer</b> |
|-------------------------|-----------------|------------------|
| <i>OarFCB5 X T156</i>   | 0.67909         | 0.64273          |
| <i>OarFCB5 X T26</i>    | 0.14909         | 0.17091          |
| <i>OarFCB5 X BM888</i>  | 0.12545         | 0.13727          |
| <i>OarFCB5 X RM188</i>  | 0.62636         | 0.60909          |
| <i>OarFCB5 X RT1</i>    | 0.22636         | 0.25545          |
| <i>OarFCB5 X T501</i>   | 0.56636         | 0.59364          |
| <i>OarFCB5 X RT13</i>   | 0.00727         | 0.01000          |
| <i>OarFCB5 X T193</i>   | 0.97455         | 0.98000          |
| <i>OarFCB5 X BM1818</i> | 0.99818         | 0.99727          |
| <i>OarFCB5 X ETH225</i> | 0.78273         | 0.77909          |
| <i>T156 X T26</i>       | 0.09364         | 0.09545          |
| <i>T156 X BM888</i>     | 0.21182         | 0.19545          |
| <i>T156 X RM188</i>     | 0.50545         | 0.54000          |
| <i>T156 X RT1</i>       | 0.05273         | 0.06273          |
| <i>T156 X T501</i>      | 0.05182         | 0.04909          |
| <i>T156 X RT13</i>      | 0.35091         | 0.36818          |
| <i>T156 X T193</i>      | 0.32818         | 0.32091          |
| <i>T156 X BM1818</i>    | 0.98000         | 0.97182          |
| <i>T156 X ETH225</i>    | 0.03455         | 0.02727          |
| <i>T26 X BM888</i>      | 0.01636         | 0.02182          |
| <i>T26 X RM188</i>      | 0.19909         | 0.16909          |
| <i>T26 X RT1</i>        | 0.02182         | 0.01545          |
| <i>T26 X T501</i>       | 0.27182         | 0.29636          |
| <i>T26 X RT13</i>       | 0.01909         | 0.01091          |
| <i>T26 X T193</i>       | 0.49182         | 0.47909          |
| <i>T26 X BM1818</i>     | 0.55818         | 0.57727          |
| <i>T26 X ETH225</i>     | 0.34909         | 0.33273          |
| <i>BM888 X RM188</i>    | 0.23636         | 0.21818          |
| <i>BM888 X RT1</i>      | 0.04818         | 0.04273          |
| <i>BM888 X T501</i>     | 0.01364         | 0.00636          |
| <i>BM888 X RT13</i>     | 0.14909         | 0.13091          |
| <i>BM888 X T193</i>     | 0.06909         | 0.05727          |
| <i>BM888 X BM1818</i>   | 0.58364         | 0.59091          |
| <i>BM888 X ETH225</i>   | 0.94000         | 0.95455          |
| <i>RM188 X RT1</i>      | 0.06455         | 0.08000          |
| <i>RM188 X T501</i>     | 0.01182         | 0.00909          |
| <i>RM188 X RT13</i>     | 0.09091         | 0.08455          |
| <i>RM188 X T193</i>     | 0.88091         | 0.87545          |
| <i>RM188 X BM1818</i>   | 0.47000         | 0.45636          |
| <i>RM188 X ETH225</i>   | 0.27545         | 0.32545          |
| <i>RT1 X T501</i>       | 0.48364         | 0.48182          |
| <i>RT1 X RT13</i>       | 0.05091         | 0.04364          |

| <b>Pairwise loci</b>   | <b>Red Deer</b> | <b>Sika Deer</b> |
|------------------------|-----------------|------------------|
| <i>RT1 X T193</i>      | 0.11455         | 0.10727          |
| <i>RT1 X BM1818</i>    | 0.96091         | 0.95545          |
| <i>RT1 X ETH225</i>    | 0.37091         | 0.39364          |
| <i>T501 X RT13</i>     | 0.00091*        | 0.00091*         |
| <i>T501 X T193</i>     | 0.75364         | 0.77182          |
| <i>T501 X BM1818</i>   | 0.58273         | 0.59364          |
| <i>T501 X ETH225</i>   | 0.29000         | 0.29364          |
| <i>RT13 X T193</i>     | 0.10909         | 0.12091          |
| <i>RT13 X BM1818</i>   | 0.71364         | 0.69364          |
| <i>RT13 X ETH225</i>   | 0.44818         | 0.43182          |
| <i>T193 X BM1818</i>   | 0.27273         | 0.26364          |
| <i>T193 X ETH225</i>   | 0.43818         | 0.43818          |
| <i>BM1818 X ETH225</i> | 0.71455         | 0.71000          |

\*  $p < 0.05$ .
