# Supplementary material for: A Microsatellite Genotyping-Based Genetic Study of Interspecific Hybridization between the Red and Sika Deer in the Western Czech Republic
Source: MDPI journal article supplement (doi:10.3390/ani11061701), 2021-06-07
Supplement: s1 [file s1]

**Table S3.** The Nei's  $D_A$  (below the diagonal) and the Reynolds'  $D_R$  genetic distances (above the diagonal) among the 7 populations studied.

|             | <b>RD-D</b> | <b>SD-D</b> | <b>SD-K</b> | <b>SD-L</b> | <b>SD-S</b> | <b>SD-Z</b> | <b>RD-S</b> |
|-------------|-------------|-------------|-------------|-------------|-------------|-------------|-------------|
| <b>RD-D</b> | 0           | 0.1924      | 0.1964      | 0.2510      | 0.2237      | 0.2121      | 0.0207      |
| <b>SD-D</b> | 0.5921      | 0           | 0.0988      | 0.1086      | 0.0545      | 0.1184      | 0.2053      |
| <b>SD-K</b> | 0.6907      | 0.2372      | 0           | 0.0552      | 0.1034      | 0.0340      | 0.2137      |
| <b>SD-L</b> | 0.7276      | 0.2342      | 0.0686      | 0           | 0.1001      | 0.0370      | 0.2659      |
| <b>SD-S</b> | 0.6044      | 0.0957      | 0.2373      | 0.2006      | 0           | 0.1035      | 0.2431      |
| <b>SD-Z</b> | 0.7113      | 0.2718      | 0.0503      | 0.0513      | 0.2461      | 0           | 0.2285      |
| <b>RD-S</b> | 0.0958      | 0.6551      | 0.7596      | 0.7804      | 0.6849      | 0.7753      | 0           |

Population code: RD-D (Red deer Doupovské hory), RD-S (Red deer Slavkovský les), SD-D (Sika deer Doupovské hory), SD-S (Sika deer Slavkovský les), SD-K (Sika deer Kladská), SD-L (Sika deer Lány), and SD-Z (Sika deer Žlutice).
