# Supplementary material for: A Microsatellite Genotyping-Based Genetic Study of Interspecific Hybridization between the Red and Sika Deer in the Western Czech Republic
Source: MDPI journal article supplement (doi:10.3390/ani11061701), 2021-06-07
Supplement: s1 [file s1]

**Table S1.** The overall population statistics with/without hybrids.

| <b>Population with hybrids</b>    | <b><i>n</i></b> | <b>Loci typed</b> | <b><math>H_E \pm SD</math></b> | <b><math>H_O \pm SD</math></b> | <b><math>NA \pm SD</math></b> |
|-----------------------------------|-----------------|-------------------|--------------------------------|--------------------------------|-------------------------------|
| Red deer                          | 63              | 11                | $0.8415 \pm 0.0180$            | $0.7305 \pm 0.0171$            | $13.00 \pm 2.83$              |
| Sika deer                         | 60              | 11                | $0.6809 \pm 0.0327$            | $0.6386 \pm 0.0189$            | $7.64 \pm 2.20$               |
| <b>Population without hybrids</b> |                 |                   |                                |                                |                               |
| Red deer                          | 54              | 11                | $0.8340 \pm 0.0194$            | $0.7168 \pm 0.0187$            | $12.18 \pm 2.93$              |
| Sika deer                         | 56              | 11                | $0.6680 \pm 0.0343$            | $0.6382 \pm 0.0196$            | $6.55 \pm 1.92$               |

$H_E$  = expected heterozygosity;  $H_O$  = observed heterozygosity;  $NA$  = No of Alleles;  
 $SD$  = standard deviation
