# Supplementary material for: A Microsatellite Genotyping-Based Genetic Study of Interspecific Hybridization between the Red and Sika Deer in the Western Czech Republic
Source: MDPI journal article supplement (doi:10.3390/ani11061701), 2021-06-07
Supplement: s1 [file s1]

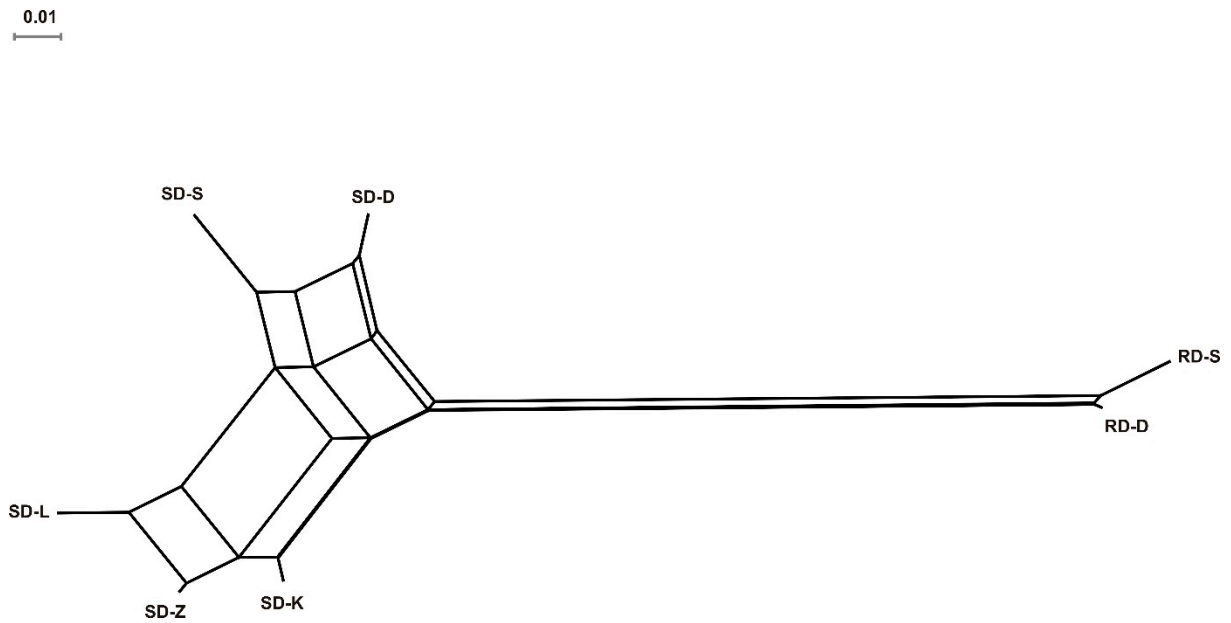

**Figure S1.** The NeighborNet dendrogram constructed from the Reynolds'  $D_R$  distances between the seven red and sika deer sampling populations ( $n = 123$ ).

Population code: RD-D (Red deer Doupovské hory), RD-S (Red deer Slavkovský les), SD-D (Sika deer Doupovské hory), SD-S (Sika deer Slavkovský les), SD-K (Sika deer Kladská), SD-L (Sika deer Lány), and SD-Z (Sika deer Žlutice).
