# Supplementary material for: A Microsatellite Genotyping-Based Genetic Study of Interspecific Hybridization between the Red and Sika Deer in the Western Czech Republic
Source: MDPI journal article supplement (doi:10.3390/ani11061701), 2021-06-07
Supplement: s1 [file s1]

**Table S4.** Microsatellite data.

| <b>Samples</b> | <b>OarFCB5</b> |     | <b>T156</b> |     | <b>T26</b> |     | <b>BM888</b> |     | <b>RM188</b> |     | <b>RT1</b> |     | <b>T501</b> |     | <b>RT13</b> |     | <b>T193</b> |     | <b>BM1818</b> |     | <b>ETH225</b> |     |
|----------------|----------------|-----|-------------|-----|------------|-----|--------------|-----|--------------|-----|------------|-----|-------------|-----|-------------|-----|-------------|-----|---------------|-----|---------------|-----|
| Animal_01      | 83             | 85  | 162         | 166 | 342        | 350 | 194          | 204 | 127          | 131 | 266        | 266 | 233         | 241 | 293         | 293 | 192         | 200 | 240           | 240 | 138           | 148 |
| Animal_02      | 83             | 85  | 142         | 150 | 342        | 342 | 194          | 204 | 127          | 131 | 260        | 262 | 233         | 249 | 297         | 309 | 192         | 212 | 242           | 246 | 142           | 148 |
| Animal_03      | 87             | 107 | 130         | 138 | 330        | 0   | 220          | 230 | 127          | 147 | 260        | 260 | 241         | 245 | 311         | 311 | 208         | 212 | 228           | 240 | 140           | 144 |
| Animal_04      | 83             | 87  | 130         | 142 | 334        | 342 | 194          | 230 | 127          | 131 | 260        | 262 | 245         | 245 | 295         | 309 | 188         | 192 | 228           | 234 | 138           | 146 |
| Animal_05      | 77             | 83  | 166         | 166 | 338        | 354 | 220          | 242 | 127          | 133 | 260        | 262 | 233         | 237 | 297         | 297 | 224         | 228 | 234           | 240 | 134           | 148 |
| Animal_06      | 85             | 85  | 146         | 166 | 338        | 338 | 192          | 220 | 131          | 131 | 260        | 266 | 233         | 245 | 295         | 311 | 188         | 196 | 240           | 250 | 146           | 148 |
| Animal_07      | 77             | 85  | 146         | 166 | 338        | 346 | 204          | 220 | 127          | 127 | 260        | 262 | 241         | 245 | 295         | 295 | 200         | 208 | 228           | 244 | 138           | 146 |
| Animal_08      | 97             | 101 | 130         | 162 | 0          | 362 | 0            | 226 | 131          | 133 | 264        | 266 | 0           | 261 | 303         | 0   | 208         | 224 | 228           | 246 | 142           | 148 |
| Animal_09      | 79             | 89  | 142         | 142 | 338        | 342 | 194          | 194 | 127          | 131 | 260        | 260 | 249         | 249 | 307         | 307 | 208         | 228 | 240           | 240 | 148           | 158 |
| Animal_10      | 85             | 89  | 130         | 166 | 338        | 350 | 204          | 230 | 127          | 133 | 260        | 276 | 233         | 241 | 295         | 297 | 220         | 228 | 234           | 246 | 140           | 154 |
| Animal_11      | 81             | 89  | 142         | 154 | 350        | 354 | 192          | 194 | 127          | 129 | 260        | 260 | 261         | 261 | 293         | 299 | 200         | 200 | 232           | 240 | 148           | 180 |
| Animal_12      | 81             | 89  | 142         | 162 | 346        | 362 | 174          | 192 | 131          | 131 | 262        | 266 | 261         | 261 | 303         | 303 | 200         | 208 | 240           | 240 | 138           | 162 |
| Animal_13      | 77             | 85  | 154         | 162 | 358        | 358 | 194          | 228 | 129          | 129 | 258        | 262 | 233         | 257 | 293         | 293 | 192         | 200 | 240           | 240 | 146           | 148 |
| Animal_14      | 77             | 85  | 138         | 150 | 330        | 342 | 192          | 194 | 125          | 125 | 262        | 268 | 233         | 233 | 303         | 303 | 212         | 224 | 242           | 250 | 138           | 142 |
| Animal_15      | 81             | 85  | 142         | 162 | 334        | 350 | 194          | 196 | 127          | 133 | 260        | 260 | 237         | 269 | 293         | 293 | 200         | 228 | 228           | 242 | 144           | 148 |
| Animal_16      | 79             | 81  | 130         | 142 | 350        | 350 | 196          | 196 | 133          | 133 | 260        | 260 | 233         | 237 | 289         | 293 | 188         | 200 | 228           | 240 | 134           | 180 |
| Animal_17      | 87             | 87  | 138         | 142 | 362        | 362 | 192          | 196 | 125          | 125 | 260        | 268 | 233         | 253 | 289         | 303 | 200         | 212 | 232           | 244 | 138           | 138 |
| Animal_18      | 77             | 85  | 142         | 146 | 358        | 362 | 174          | 194 | 129          | 131 | 260        | 268 | 233         | 257 | 299         | 303 | 184         | 200 | 232           | 242 | 146           | 148 |
| Animal_19      | 87             | 89  | 150         | 162 | 330        | 342 | 192          | 238 | 127          | 127 | 260        | 262 | 233         | 261 | 307         | 323 | 184         | 196 | 232           | 250 | 148           | 156 |
| Animal_20      | 85             | 89  | 138         | 138 | 350        | 358 | 192          | 192 | 129          | 129 | 260        | 262 | 233         | 261 | 293         | 307 | 192         | 200 | 234           | 0   | 156           | 156 |
| Animal_21      | 81             | 89  | 154         | 162 | 322        | 362 | 192          | 196 | 135          | 135 | 256        | 268 | 233         | 233 | 307         | 307 | 188         | 212 | 232           | 242 | 144           | 148 |
| Animal_22      | 79             | 87  | 146         | 146 | 314        | 358 | 192          | 192 | 129          | 129 | 256        | 260 | 233         | 233 | 303         | 303 | 168         | 188 | 240           | 250 | 138           | 138 |
| Animal_23      | 87             | 89  | 150         | 162 | 330        | 358 | 192          | 234 | 127          | 127 | 260        | 268 | 233         | 261 | 289         | 289 | 216         | 228 | 240           | 240 | 134           | 154 |
| Animal_24      | 89             | 93  | 138         | 166 | 330        | 350 | 194          | 194 | 127          | 127 | 260        | 260 | 233         | 245 | 293         | 311 | 180         | 200 | 240           | 240 | 138           | 142 |
| Animal_25      | 87             | 93  | 150         | 178 | 338        | 362 | 174          | 190 | 127          | 133 | 250        | 260 | 237         | 261 | 323         | 323 | 188         | 196 | 232           | 242 | 152           | 152 |
| Animal_26      | 77             | 87  | 138         | 138 | 342        | 354 | 192          | 192 | 135          | 135 | 260        | 268 | 233         | 233 | 303         | 323 | 168         | 192 | 234           | 246 | 148           | 152 |
| Animal_27      | 79             | 89  | 138         | 138 | 362        | 362 | 192          | 192 | 127          | 127 | 260        | 268 | 261         | 261 | 303         | 303 | 196         | 196 | 240           | 250 | 138           | 142 |
| Animal_28      | 79             | 85  | 142         | 178 | 346        | 350 | 192          | 192 | 127          | 129 | 262        | 268 | 253         | 257 | 289         | 303 | 188         | 192 | 240           | 240 | 138           | 158 |
| Animal_29      | 77             | 85  | 142         | 162 | 346        | 362 | 192          | 192 | 127          | 129 | 260        | 262 | 233         | 269 | 293         | 303 | 188         | 200 | 228           | 242 | 146           | 160 |
| Animal_30      | 85             | 87  | 138         | 150 | 338        | 0   | 192          | 192 | 125          | 125 | 260        | 262 | 233         | 253 | 289         | 323 | 212         | 220 | 232           | 242 | 138           | 142 |
| Animal_31      | 77             | 89  | 166         | 166 | 330        | 346 | 174          | 0   | 129          | 129 | 260        | 268 | 257         | 261 | 301         | 301 | 172         | 188 | 234           | 240 | 138           | 142 |
| Animal_32      | 77             | 101 | 130         | 178 | 342        | 358 | 194          | 238 | 129          | 129 | 260        | 268 | 253         | 261 | 303         | 303 | 200         | 212 | 240           | 240 | 138           | 146 |
| Animal_33      | 85             | 89  | 166         | 174 | 338        | 346 | 190          | 194 | 127          | 127 | 260        | 262 | 265         | 265 | 293         | 303 | 196         | 220 | 240           | 250 | 134           | 146 |
| Animal_34      | 79             | 79  | 130         | 138 | 0          | 362 | 194          | 0   | 125          | 127 | 262        | 268 | 237         | 0   | 291         | 291 | 188         | 196 | 244           | 250 | 156           | 180 |
| Animal_35      | 85             | 89  | 130         | 162 | 342        | 362 | 174          | 194 | 127          | 131 | 256        | 260 | 233         | 265 | 307         | 307 | 212         | 220 | 232           | 242 | 138           | 146 |
| Animal_36      | 83             | 83  | 142         | 142 | 338        | 358 | 194          | 240 | 127          | 129 | 260        | 280 | 233         | 233 | 289         | 323 | 188         | 196 | 234           | 246 | 146           | 158 |
| Animal_37      | 87             | 89  | 138         | 162 | 330        | 334 | 190          | 192 | 127          | 129 | 260        | 260 | 261         | 0   | 303         | 311 | 220         | 220 | 240           | 250 | 138           | 142 |
| Animal_38      | 89             | 89  | 146         | 162 | 334        | 354 | 190          | 242 | 127          | 129 | 260        | 264 | 233         | 233 | 303         | 303 | 220         | 0   | 240           | 240 | 146           | 154 |
| Animal_39      | 77             | 81  | 138         | 154 | 346        | 350 | 192          | 194 | 131          | 131 | 260        | 262 | 261         | 261 | 289         | 303 | 208         | 224 | 234           | 240 | 146           | 146 |
| Animal_40      | 77             | 89  | 138         | 170 | 358        | 370 | 192          | 192 | 127          | 129 | 260        | 268 | 233         | 0   | 301         | 301 | 208         | 212 | 240           | 242 | 142           | 146 |
| Animal_41      | 85             | 85  | 150         | 154 | 346        | 358 | 204          | 242 | 127          | 127 | 266        | 266 | 233         | 265 | 297         | 323 | 212         | 220 | 232           | 240 | 146           | 146 |
| Animal_42      | 77             | 85  | 150         | 166 | 358        | 358 | 190          | 192 | 131          | 131 | 268        | 270 | 233         | 237 | 325         | 0   | 188         | 200 | 232           | 242 | 138           | 146 |
| Animal_43      | 87             | 95  | 150         | 150 | 358        | 362 | 192          | 196 | 123          | 131 | 260        | 272 | 245         | 261 | 303         | 307 | 180         | 200 | 240           | 240 | 138           | 156 |
| Animal_44      | 79             | 89  | 162         | 166 | 358        | 358 | 174          | 174 | 127          | 135 | 260        | 260 | 257         | 257 | 311         | 323 | 204         | 208 | 232           | 234 | 148           | 148 |
| Animal_45      | 81             | 83  | 150         | 150 | 346        | 346 | 174          | 224 | 129          | 129 | 258        | 260 | 233         | 253 | 303         | 311 | 228         | 0   | 234           | 250 | 138           | 148 |
| Animal_46      | 87             | 87  | 130         | 142 | 334        | 350 | 194          | 224 | 127          | 129 | 268        | 268 | 233         | 233 | 289         | 301 | 228         | 228 | 240           | 250 | 148           | 154 |
| Animal_47      | 89             | 107 | 130         | 142 | 350        | 354 | 192          | 192 | 127          | 137 | 260        | 260 | 237         | 253 | 293         | 293 | 192         | 216 | 232           | 240 | 138           | 138 |
| Animal_48      | 81             | 85  | 130         | 162 | 354        | 354 | 194          | 232 | 129          | 129 | 260        | 280 | 253         | 265 | 289         | 293 | 228         | 228 | 232           | 240 | 142           | 154 |
| Animal_49      | 85             | 89  | 142         | 142 | 0          | 350 | 194          | 216 | 127          | 135 | 260        | 260 | 237         | 261 | 307         | 307 | 192         | 196 | 240           | 242 | 146           | 154 |
| Animal_50      | 79             | 87  | 150         | 162 | 346        | 350 | 190          | 194 | 127          | 127 | 260        | 260 | 233         | 269 | 285         | 285 | 192         | 192 | 234           | 240 | 138           | 154 |
| Animal_51      | 79             | 85  | 130         | 162 | 350        | 350 | 192          | 216 | 129          | 129 | 260        | 262 | 233         | 269 | 285         | 325 | 208         | 224 | 234           | 250 | 138           | 138 |
| Animal_52      | 79             | 79  | 142         | 166 | 314        | 358 | 192          | 222 | 127          | 131 | 260        | 260 | 233         | 261 | 293         | 293 | 212         | 228 | 240           | 240 | 146           | 146 |
| Animal_53      | 87             | 89  | 134         | 0   | 334        | 346 | 174          | 196 | 129          | 133 | 260        | 262 | 0           | 257 | 293         | 293 | 188         | 192 | 246           | 250 | 142           | 160 |
| Animal_54      | 79             | 101 | 126         | 146 | 342        | 358 | 190          | 192 | 129          | 139 | 262        | 268 | 249         | 253 | 289         | 289 | 220         | 228 | 228           | 244 | 142           | 158 |
| Animal_55      | 83             | 87  | 162         | 178 | 346        | 350 | 192          | 230 | 127          | 127 | 256        | 256 | 233         | 257 | 289         | 303 | 220         | 224 | 232           | 232 | 138           | 138 |

| Samples    | OurFCB5 |    | T156 |     | T26 |     | BM888 |     | RM188 |     | RT1 |     | T501 |     | RT13 |     | T193 |     | BM1818 |     | ETH225 |     |
|------------|---------|----|------|-----|-----|-----|-------|-----|-------|-----|-----|-----|------|-----|------|-----|------|-----|--------|-----|--------|-----|
| Animal_56  | 81      | 85 | 138  | 178 | 350 | 362 | 194   | 196 | 129   | 139 | 260 | 280 | 233  | 233 | 303  | 323 | 196  | 0   | 244    | 250 | 138    | 138 |
| Animal_57  | 89      | 89 | 142  | 178 | 350 | 362 | 174   | 222 | 129   | 129 | 260 | 268 | 233  | 233 | 303  | 323 | 188  | 192 | 244    | 244 | 138    | 138 |
| Animal_58  | 85      | 85 | 130  | 154 | 334 | 362 | 192   | 194 | 125   | 125 | 260 | 260 | 0    | 257 | 293  | 313 | 208  | 212 | 246    | 250 | 138    | 138 |
| Animal_59  | 85      | 87 | 130  | 162 | 350 | 362 | 174   | 174 | 129   | 131 | 260 | 280 | 233  | 257 | 285  | 293 | 200  | 220 | 228    | 240 | 148    | 156 |
| Animal_60  | 89      | 93 | 146  | 208 | 338 | 366 | 194   | 194 | 129   | 129 | 260 | 260 | 257  | 257 | 329  | 329 | 208  | 228 | 234    | 250 | 138    | 154 |
| Animal_61  | 79      | 87 | 162  | 162 | 354 | 358 | 190   | 232 | 129   | 137 | 260 | 262 | 237  | 237 | 303  | 311 | 216  | 220 | 228    | 232 | 138    | 154 |
| Animal_62  | 87      | 89 | 130  | 162 | 330 | 354 | 190   | 192 | 125   | 129 | 256 | 280 | 0    | 273 | 289  | 293 | 220  | 228 | 244    | 244 | 138    | 156 |
| Animal_63  | 77      | 77 | 142  | 162 | 350 | 362 | 194   | 194 | 133   | 133 | 260 | 260 | 237  | 257 | 303  | 303 | 208  | 212 | 234    | 242 | 142    | 156 |
| Animal_64  | 85      | 87 | 142  | 150 | 342 | 350 | 200   | 204 | 145   | 155 | 264 | 272 | 241  | 245 | 297  | 301 | 260  | 260 | 240    | 240 | 144    | 144 |
| Animal_65  | 85      | 89 | 142  | 150 | 350 | 350 | 200   | 204 | 145   | 145 | 270 | 272 | 245  | 245 | 307  | 307 | 260  | 336 | 240    | 240 | 142    | 142 |
| Animal_66  | 85      | 99 | 150  | 182 | 350 | 354 | 200   | 200 | 145   | 155 | 266 | 272 | 245  | 245 | 307  | 307 | 260  | 320 | 240    | 254 | 144    | 148 |
| Animal_67  | 85      | 85 | 174  | 182 | 350 | 354 | 200   | 200 | 0     | 185 | 264 | 272 | 245  | 249 | 297  | 297 | 320  | 332 | 240    | 254 | 142    | 158 |
| Animal_68  | 85      | 85 | 150  | 166 | 350 | 354 | 200   | 200 | 145   | 165 | 264 | 270 | 241  | 245 | 301  | 301 | 260  | 276 | 240    | 240 | 142    | 166 |
| Animal_69  | 85      | 85 | 166  | 166 | 338 | 342 | 200   | 200 | 145   | 165 | 264 | 270 | 245  | 245 | 297  | 307 | 260  | 260 | 242    | 268 | 142    | 144 |
| Animal_70  | 85      | 85 | 166  | 182 | 342 | 354 | 190   | 200 | 145   | 145 | 264 | 264 | 245  | 249 | 297  | 301 | 276  | 276 | 240    | 254 | 142    | 142 |
| Animal_71  | 85      | 85 | 166  | 170 | 338 | 350 | 190   | 202 | 147   | 157 | 266 | 266 | 229  | 257 | 303  | 309 | 260  | 366 | 242    | 254 | 142    | 144 |
| Animal_72  | 85      | 85 | 150  | 174 | 350 | 354 | 198   | 210 | 147   | 147 | 266 | 266 | 235  | 261 | 299  | 299 | 260  | 320 | 254    | 254 | 144    | 144 |
| Animal_73  | 79      | 85 | 146  | 150 | 0   | 366 | 200   | 212 | 147   | 155 | 270 | 282 | 237  | 259 | 313  | 0   | 260  | 260 | 240    | 240 | 142    | 144 |
| Animal_74  | 79      | 87 | 166  | 182 | 336 | 348 | 200   | 212 | 145   | 145 | 264 | 264 | 243  | 245 | 297  | 309 | 316  | 320 | 240    | 240 | 144    | 144 |
| Animal_75  | 85      | 89 | 140  | 174 | 340 | 348 | 200   | 204 | 145   | 163 | 264 | 266 | 245  | 249 | 297  | 303 | 260  | 320 | 242    | 254 | 142    | 142 |
| Animal_76  | 85      | 87 | 144  | 182 | 336 | 348 | 200   | 204 | 147   | 155 | 266 | 272 | 245  | 249 | 297  | 297 | 260  | 320 | 254    | 254 | 144    | 148 |
| Animal_77  | 85      | 87 | 166  | 182 | 340 | 348 | 200   | 212 | 147   | 155 | 264 | 270 | 243  | 249 | 303  | 309 | 260  | 320 | 240    | 242 | 142    | 144 |
| Animal_78  | 85      | 87 | 170  | 182 | 336 | 340 | 200   | 204 | 145   | 155 | 264 | 270 | 245  | 245 | 297  | 303 | 260  | 276 | 240    | 240 | 142    | 144 |
| Animal_79  | 79      | 87 | 140  | 144 | 340 | 348 | 200   | 200 | 145   | 153 | 264 | 272 | 245  | 245 | 297  | 307 | 260  | 260 | 254    | 0   | 142    | 144 |
| Animal_80  | 85      | 89 | 170  | 182 | 340 | 348 | 204   | 210 | 145   | 153 | 264 | 266 | 243  | 245 | 303  | 309 | 260  | 276 | 240    | 254 | 144    | 144 |
| Animal_81  | 85      | 89 | 166  | 182 | 348 | 348 | 204   | 210 | 147   | 155 | 264 | 264 | 245  | 249 | 307  | 309 | 260  | 336 | 242    | 268 | 142    | 144 |
| Animal_82  | 81      | 85 | 148  | 174 | 336 | 340 | 200   | 204 | 145   | 147 | 266 | 270 | 245  | 249 | 303  | 307 | 320  | 332 | 268    | 0   | 142    | 144 |
| Animal_83  | 85      | 89 | 166  | 170 | 348 | 348 | 200   | 200 | 145   | 145 | 264 | 270 | 245  | 245 | 301  | 307 | 320  | 332 | 240    | 240 | 142    | 144 |
| Animal_84  | 85      | 85 | 144  | 170 | 340 | 348 | 198   | 200 | 147   | 155 | 270 | 270 | 245  | 245 | 301  | 301 | 316  | 320 | 242    | 254 | 144    | 144 |
| Animal_85  | 85      | 85 | 166  | 0   | 340 | 340 | 200   | 200 | 145   | 163 | 264 | 264 | 245  | 245 | 297  | 297 | 260  | 336 | 254    | 268 | 142    | 142 |
| Animal_86  | 85      | 87 | 148  | 166 | 336 | 348 | 204   | 210 | 145   | 145 | 266 | 272 | 243  | 245 | 297  | 303 | 260  | 276 | 240    | 254 | 142    | 144 |
| Animal_87  | 85      | 85 | 140  | 174 | 340 | 340 | 200   | 204 | 145   | 153 | 264 | 266 | 243  | 245 | 297  | 307 | 260  | 320 | 242    | 268 | 142    | 144 |
| Animal_88  | 85      | 87 | 148  | 148 | 348 | 348 | 200   | 210 | 145   | 155 | 272 | 272 | 245  | 245 | 297  | 307 | 260  | 336 | 240    | 240 | 144    | 144 |
| Animal_89  | 85      | 85 | 148  | 174 | 336 | 348 | 204   | 204 | 145   | 145 | 264 | 264 | 245  | 249 | 297  | 297 | 316  | 320 | 254    | 254 | 142    | 144 |
| Animal_90  | 85      | 87 | 148  | 166 | 340 | 348 | 200   | 200 | 145   | 153 | 264 | 264 | 245  | 245 | 297  | 297 | 260  | 260 | 242    | 268 | 142    | 144 |
| Animal_91  | 85      | 87 | 0    | 166 | 340 | 348 | 200   | 200 | 145   | 145 | 264 | 264 | 243  | 245 | 297  | 301 | 260  | 260 | 240    | 240 | 144    | 144 |
| Animal_92  | 85      | 85 | 166  | 182 | 340 | 340 | 200   | 204 | 145   | 145 | 264 | 266 | 245  | 245 | 301  | 307 | 260  | 276 | 254    | 254 | 142    | 144 |
| Animal_93  | 81      | 85 | 170  | 182 | 336 | 348 | 190   | 200 | 145   | 145 | 264 | 272 | 243  | 245 | 297  | 303 | 320  | 336 | 242    | 268 | 142    | 144 |
| Animal_94  | 85      | 85 | 148  | 170 | 348 | 348 | 204   | 210 | 0     | 163 | 264 | 272 | 243  | 249 | 297  | 297 | 260  | 260 | 240    | 240 | 144    | 144 |
| Animal_95  | 85      | 85 | 140  | 148 | 340 | 348 | 204   | 204 | 145   | 163 | 264 | 264 | 245  | 249 | 297  | 297 | 260  | 320 | 240    | 254 | 144    | 144 |
| Animal_96  | 85      | 85 | 166  | 174 | 0   | 350 | 190   | 202 | 147   | 147 | 266 | 266 | 243  | 0   | 305  | 309 | 260  | 332 | 254    | 268 | 142    | 144 |
| Animal_97  | 85      | 85 | 166  | 170 | 334 | 354 | 198   | 210 | 147   | 147 | 266 | 266 | 245  | 245 | 0    | 309 | 260  | 316 | 240    | 254 | 144    | 144 |
| Animal_98  | 85      | 85 | 142  | 166 | 342 | 354 | 200   | 200 | 145   | 165 | 264 | 264 | 245  | 245 | 301  | 307 | 260  | 320 | 242    | 254 | 142    | 142 |
| Animal_99  | 85      | 85 | 150  | 166 | 338 | 342 | 190   | 200 | 145   | 145 | 264 | 264 | 241  | 245 | 297  | 307 | 320  | 336 | 254    | 254 | 142    | 144 |
| Animal_100 | 85      | 99 | 150  | 150 | 342 | 354 | 200   | 204 | 145   | 145 | 264 | 264 | 241  | 249 | 301  | 307 | 260  | 332 | 240    | 240 | 142    | 142 |
| Animal_101 | 85      | 85 | 166  | 170 | 354 | 354 | 200   | 204 | 145   | 155 | 264 | 264 | 245  | 245 | 297  | 307 | 260  | 260 | 254    | 254 | 142    | 144 |
| Animal_102 | 85      | 85 | 142  | 182 | 342 | 342 | 200   | 200 | 0     | 155 | 264 | 266 | 241  | 249 | 303  | 303 | 260  | 320 | 240    | 240 | 144    | 144 |
| Animal_103 | 85      | 89 | 166  | 166 | 338 | 342 | 200   | 200 | 141   | 0   | 262 | 264 | 245  | 245 | 297  | 307 | 320  | 336 | 254    | 0   | 142    | 144 |
| Animal_104 | 85      | 89 | 150  | 166 | 350 | 366 | 200   | 204 | 145   | 157 | 264 | 270 | 245  | 245 | 301  | 307 | 260  | 260 | 240    | 254 | 142    | 144 |
| Animal_105 | 81      | 89 | 166  | 166 | 362 | 370 | 198   | 198 | 141   | 145 | 264 | 270 | 245  | 245 | 307  | 307 | 260  | 336 | 254    | 254 | 142    | 144 |
| Animal_106 | 81      | 81 | 166  | 174 | 350 | 354 | 200   | 200 | 145   | 157 | 264 | 270 | 245  | 245 | 301  | 301 | 260  | 336 | 240    | 240 | 144    | 144 |
| Animal_107 | 81      | 85 | 170  | 174 | 350 | 350 | 198   | 200 | 145   | 165 | 264 | 264 | 245  | 245 | 299  | 301 | 276  | 316 | 240    | 254 | 142    | 142 |
| Animal_108 | 81      | 85 | 150  | 174 | 342 | 350 | 200   | 204 | 145   | 145 | 262 | 264 | 245  | 245 | 297  | 301 | 276  | 320 | 240    | 242 | 144    | 144 |
| Animal_109 | 81      | 93 | 166  | 166 | 342 | 350 | 198   | 204 | 141   | 145 | 264 | 270 | 245  | 245 | 301  | 307 | 260  | 320 | 254    | 254 | 144    | 144 |
| Animal_110 | 81      | 81 | 166  | 166 | 342 | 350 | 200   | 200 | 145   | 0   | 262 | 264 | 245  | 245 | 301  | 301 | 260  | 260 | 240    | 254 | 142    | 144 |
| Animal_111 | 89      | 93 | 166  | 166 | 342 | 342 | 200   | 200 | 147   | 147 | 264 | 270 | 245  | 245 | 301  | 301 | 316  | 320 | 240    | 240 | 142    | 144 |
| Animal_112 | 85      | 85 | 150  | 174 | 350 | 350 | 210   | 210 | 145   | 155 | 264 | 264 | 245  | 245 | 297  | 307 | 320  | 332 | 240    | 254 | 144    | 144 |

| <b>Samples</b> | <b><i>OurFCB5</i></b> |    | <b><i>T156</i></b> |     | <b><i>T26</i></b> |     | <b><i>BM888</i></b> |     | <b><i>RM188</i></b> |     | <b><i>RT1</i></b> |     | <b><i>T501</i></b> |     | <b><i>RT13</i></b> |     | <b><i>T193</i></b> |     | <b><i>BM1818</i></b> |     | <b><i>ETH225</i></b> |     |
|----------------|-----------------------|----|--------------------|-----|-------------------|-----|---------------------|-----|---------------------|-----|-------------------|-----|--------------------|-----|--------------------|-----|--------------------|-----|----------------------|-----|----------------------|-----|
| Animal_113     | 85                    | 85 | 150                | 166 | 338               | 342 | 200                 | 200 | 145                 | 155 | 264               | 264 | 241                | 245 | 297                | 297 | 260                | 320 | 240                  | 240 | 144                  | 144 |
| Animal_114     | 81                    | 85 | 150                | 166 | 342               | 354 | 200                 | 200 | 155                 | 0   | 264               | 264 | 245                | 245 | 297                | 303 | 260                | 320 | 240                  | 254 | 142                  | 144 |
| Animal_115     | 87                    | 87 | 166                | 170 | 342               | 354 | 190                 | 200 | 145                 | 145 | 264               | 264 | 245                | 249 | 297                | 297 | 260                | 260 | 240                  | 254 | 142                  | 144 |
| Animal_116     | 79                    | 79 | 166                | 166 | 336               | 336 | 198                 | 212 | 145                 | 145 | 264               | 264 | 243                | 245 | 297                | 309 | 316                | 320 | 254                  | 268 | 142                  | 144 |
| Animal_117     | 85                    | 87 | 140                | 144 | 336               | 348 | 198                 | 200 | 145                 | 163 | 264               | 266 | 245                | 245 | 297                | 303 | 260                | 320 | 254                  | 254 | 142                  | 144 |
| Animal_118     | 85                    | 87 | 140                | 174 | 340               | 340 | 200                 | 212 | 145                 | 155 | 266               | 272 | 243                | 249 | 297                | 303 | 260                | 336 | 240                  | 240 | 144                  | 144 |
| Animal_119     | 85                    | 85 | 166                | 182 | 340               | 348 | 204                 | 210 | 145                 | 155 | 264               | 266 | 245                | 249 | 297                | 297 | 260                | 276 | 240                  | 242 | 142                  | 142 |
| Animal_120     | 81                    | 85 | 148                | 166 | 336               | 348 | 200                 | 204 | 145                 | 153 | 264               | 272 | 243                | 245 | 297                | 307 | 260                | 260 | 240                  | 240 | 144                  | 144 |
| Animal_121     | 85                    | 89 | 166                | 182 | 340               | 340 | 200                 | 212 | 145                 | 163 | 264               | 272 | 245                | 245 | 297                | 301 | 316                | 320 | 242                  | 242 | 144                  | 144 |
| Animal_122     | 85                    | 89 | 166                | 170 | 348               | 348 | 204                 | 210 | 145                 | 153 | 264               | 264 | 243                | 245 | 303                | 309 | 260                | 276 | 254                  | 254 | 142                  | 144 |
| Animal_123     | 85                    | 87 | 148                | 148 | 340               | 348 | 204                 | 210 | 145                 | 163 | 264               | 266 | 243                | 245 | 297                | 303 | 320                | 332 | 254                  | 268 | 144                  | 144 |
